# Supplementary material
Source: PubMed Central journal article supplement (PMC6042134)
Supplement: pnas.1805358115.sapp.pdf [file pnas.1805358115.sapp.pdf]

# Enhanced mRNA delivery into lymphocytes enabled by lipid-varied libraries of Charge-Altering Releasable Transporters

Colin J. McKinlay<sup>a,1</sup>, Nancy L. Benner<sup>a,1</sup>, Ole A. Haabeth,<sup>c</sup> Robert M. Waymouth<sup>a,2</sup>, Paul A. Wender<sup>a,b,2</sup>

Departments of <sup>a</sup>Chemistry, and <sup>b</sup>Chemical and Systems Biology, Stanford University, Stanford, CA 94305

<sup>c</sup>Department of Medicine, Division of Oncology, Stanford Cancer Institute, Stanford University, Stanford, CA 94305

## Supplementary Information

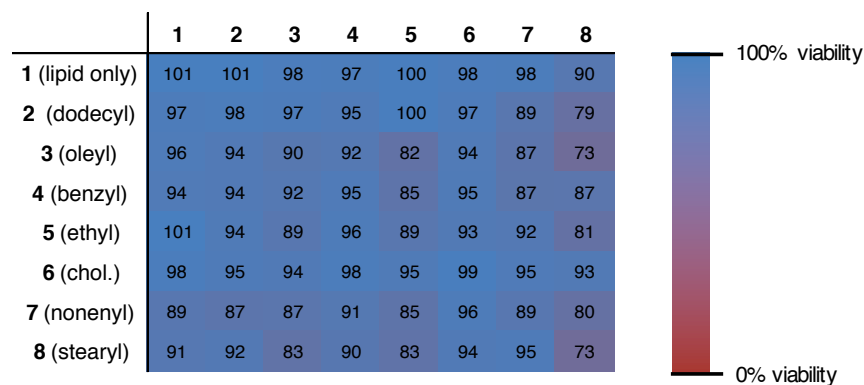

**Fig. S1.** MTT viability assay of Jurkat cells treated with mixtures of amphipathic CARTs for the delivery of luciferase (Fluc) mRNA.

| <b>CART</b>                                                            | <b>M<sub>n</sub> (NMR)</b> | <b>M<sub>n</sub> (GPC)</b> | <b>M<sub>w</sub> (GPC)</b> | <b>Đ (GPC)</b> |
|------------------------------------------------------------------------|----------------------------|----------------------------|----------------------------|----------------|
| D <sub>11</sub> : <b>1</b>                                             | 3716                       | 2923                       | 4585                       | 1.56           |
| D <sub>13</sub> :A <sub>11</sub> : <b>2</b>                            | 7002                       | 6013                       | 7516                       | 1.25           |
| O <sub>11</sub> :A <sub>9</sub> : <b>3</b>                             | 6436                       | 5080                       | 7038                       | 1.39           |
| Bn <sub>10</sub> :A <sub>11</sub> : <b>4</b>                           | 4973                       | 6458                       | 8147                       | 1.26           |
| Et <sub>15</sub> :A <sub>19</sub> : <b>5</b>                           | 7013                       | 8006                       | 10100                      | 1.26           |
| Chol <sub>13</sub> :A <sub>11</sub> : <b>6</b>                         | 9185                       | 3376                       | 4287                       | 1.27           |
| N <sub>10</sub> :A <sub>10</sub> : <b>7</b>                            | 4964                       | 4098                       | 5424                       | 1.32           |
| S <sub>10</sub> :A <sub>9</sub> : <b>8</b>                             | 6045                       | 5683                       | 7400                       | 1.31           |
| O <sub>5-<i>b</i></sub> -N <sub>6</sub> :A <sub>9</sub> : <b>9</b>     | 5671                       | 4632                       | 5992                       | 1.29           |
| N <sub>5-<i>b</i></sub> -O <sub>6</sub> :A <sub>10</sub> : <b>10</b>   | 5998                       | 4608                       | 5931                       | 1.28           |
| O <sub>4-<i>stat</i></sub> -N <sub>4</sub> :A <sub>8</sub> : <b>11</b> | 4492                       | 5563                       | 6676                       | 1.20           |
| BDK-D <sub>12</sub> :A <sub>14</sub> : <b>12</b>                       | 7471                       | 4632                       | 5992                       | 1.29           |
| BDK-O <sub>7</sub> :N <sub>7</sub> :A <sub>13</sub> : <b>13</b>        | 7782                       | 6424                       | 8497                       | 1.32           |

**Fig. S2.** GPC characterization of new CARTs containing mixed lipid blocks. All GPC data is recorded in THF relative to polystyrene standards.

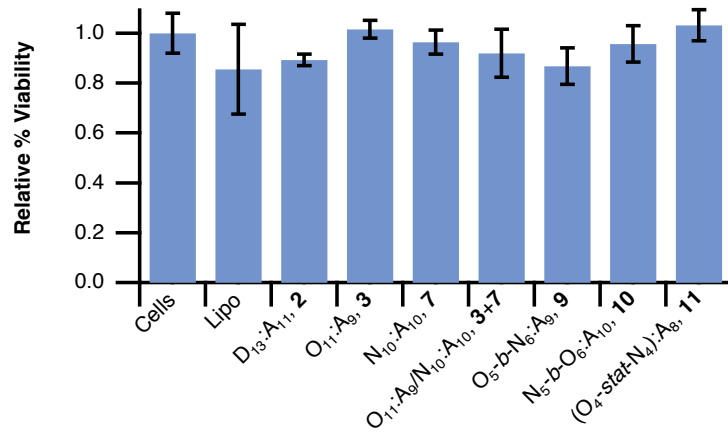

**Fig. S3.** MTT viability assay of Jurkat cells treated with single-lipid CART-mRNA complexes as well as covalent and non-covalent lipid-mixed CART-mRNA complexes. Each bar is the average of three separate experiments with error bar representing the standard deviation.

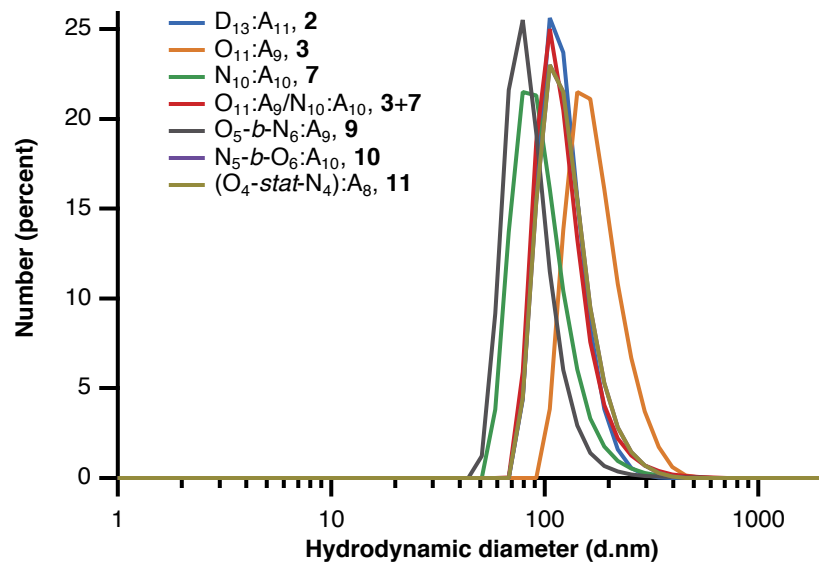

**Fig. S4.** DLS traces of single-lipid CARTs as well as covalent and non-covalent lipid-mixed CARTs complexed with luciferase (Fluc) mRNA.

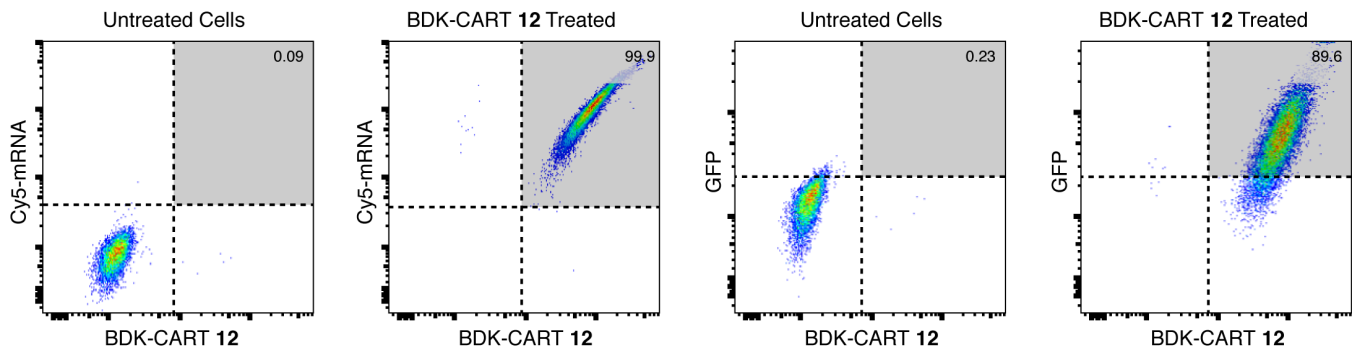

**Fig. S5.** Flow cytometry dot plots of HeLa cells treated with BDK-CART 12 complexed with Cy5-labeled eGFP mRNA, demonstrating a linear relationship between A) CART 12 fluorescence and Cy5 fluorescence and B) CART 12 fluorescence and resulting EGFP expression

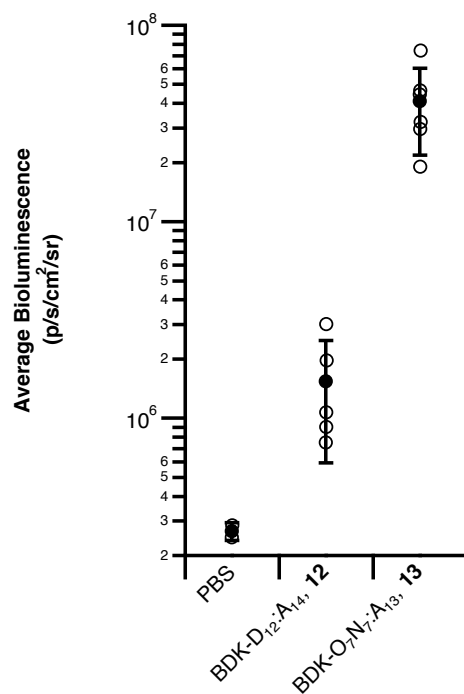

**Fig. S6.** Average bioluminescence intensity for female BALB/c mice injected with 3 ug Fluc mRNA complexed with either single-lipid CART BDK-D<sub>12</sub>:A<sub>14</sub> (**12**) or mixed-lipid CART BDK-O<sub>7</sub>:N<sub>7</sub>:A<sub>13</sub> (**13**). Open markers represent individual measurements while filled markers are the average. Error bars represent standard deviation with n = 2 for PBS, n = 5 for CART **12**, and n = 6 for CART **13**.

PBS-treated

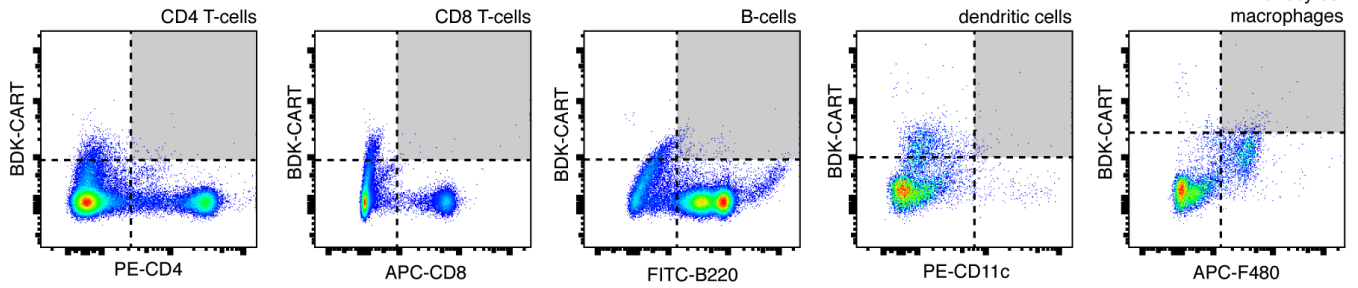

CART 13-treated

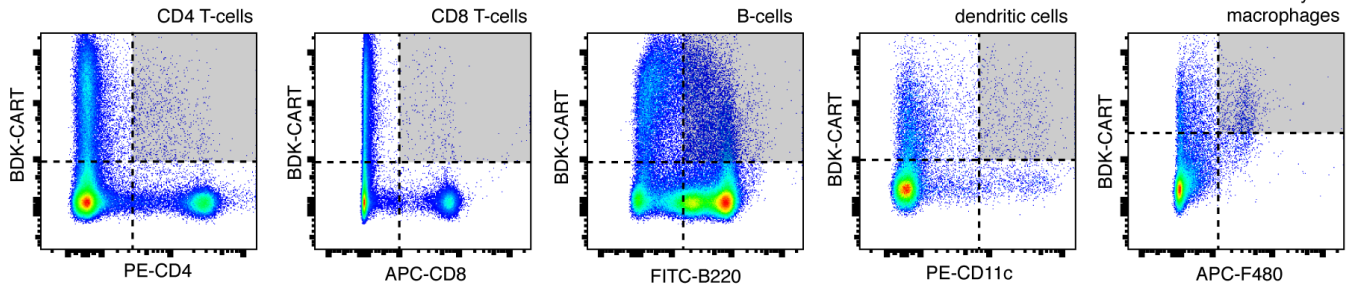

**Fig. S7.** Representative flow cytometry dot plots for *in vivo* transfection data for mice treated with PBS or CART BDK-O<sub>7</sub>:N<sub>7</sub>:A<sub>13</sub> (**13**). Cells were first gated on scatter to isolate lymphocytes (for T-cells and B-cells) or monocytes (for DC's and macrophages) and then for singlets. Standard surface markers were used for cell-type determination as shown. Percentages for each transfected population are shown in Fig 8C.

## Synthetic and Experimental Procedures

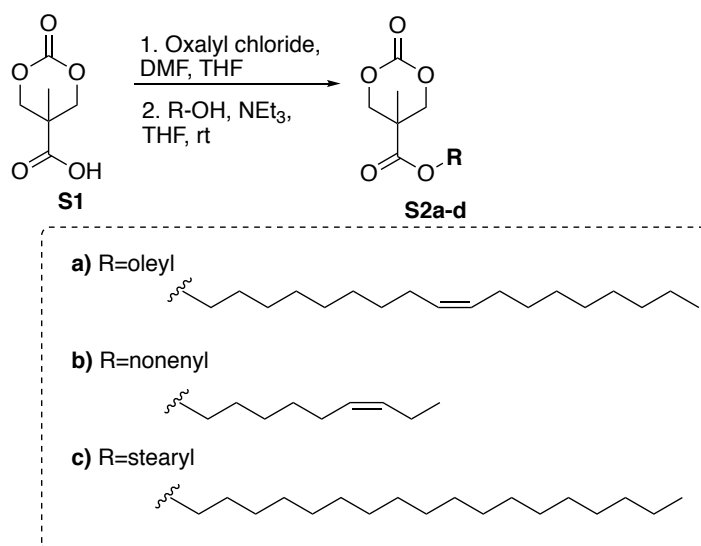

### Synthesis of MTC monomers (S2a-c)

For the representative synthesis of MTC<sub>oleyl</sub> **S2a**, to a flame-dried round bottom flask was added a solution of cyclic carbonate carboxylic acid **S1**<sup>1</sup> (1.56 mmol, 1 eq.), in dry THF (8 ml). To this was then added catalytic dry DMF (2 drops) followed by a solution of oxalyl chloride (1.59 mmol, 1.02 eq.) in 3 mL THF. The reaction stirred for 1 hour at room temperature before volatiles were removed to yield the acid chloride, which was used without further purification.

Triethylamine (1.71 mmol, 1.1 eq.) was added to a solution of oleyl alcohol (1.56 mmol, 1 eq.) in THF (2 mL). This solution was then added to the crude acid chloride prepared above in THF (3 mL). The reaction stirred at room temperature overnight under nitrogen. The reaction was then filtered and concentrated *in vacuo*. Purification of the resulting material by silica gel column chromatography (30→40% EtOAc/pentane) yielded the desired product.

MTC dodecyl, benzyl, ethyl, and cholesterol monomers were prepared as previously reported.<sup>1,2</sup>

### MTC<sub>oleyl</sub> (S2a) (46 % yield)

<sup>1</sup>H NMR (300 MHz, CDCl<sub>3</sub>) δ 5.41-5.28 (m, 2H), 4.69 (d, 2H, *J* = 10.8 Hz), 4.24-4.13 (m, 4H), 2.07-1.91 (m, 4H), 1.66 (*app* p, 2H, *J* = 6.7 Hz), 1.39-1.18 (m, 25H), 0.88 (t, 3H, *J* = 6.6 Hz) ppm.

<sup>13</sup>C NMR (300 MHz, CDCl<sub>3</sub>) δ 171.2, 147.6, 130.1, 129.9, 73.1, 66.6, 40.3, 32.8 32.1, 29.9, 29.8, 29.7, 29.5, 29.5, 29.3, 29.3, 28.5, 27.4, 27.3, 25.9, 22.8, 17.8, 14.3 ppm.

### MTC<sub>nonenyl</sub> (S2b) (43 % yield)

<sup>1</sup>H NMR (300 MHz, CDCl<sub>3</sub>) δ 5.44-5.22 (m, 2H), 4.68 (d, 2H, *J* = 10.9 Hz), 4.24-4.13 (m, 4H), 2.02 (*app* p, 4H, *J* = 7.1 Hz), 1.73-1.60 (m, 2H), 1.43-1.29 (m, 4H), 1.33 (s, 3H), 0.95 (t, 3H, *J* = 7.5 Hz) ppm.

<sup>13</sup>C NMR (300 MHz, CDCl<sub>3</sub>) δ 171.2, 147.6, 132.1, 128.7, 73.1, 66.5, 40.3, 29.3, 28.4, 27.0, 25.4, 20.6, 17.8, 14.5 ppm.



**MTC<sub>stearyl</sub> (S2c)** (52% yield)

<sup>1</sup>H NMR (500 MHz, CDCl<sub>3</sub>) δ 4.68 (d, 2H, *J* = 10.9 Hz), 4.23-4.14 (m, 4H), 1.70-1.58 (m, 2H), 1.37-1.17 (m, 33H), 0.92-0.82 (m, 3H) ppm.

<sup>13</sup>C NMR (500 MHz, CDCl<sub>3</sub>) δ 171.3, 147.7, 73.6, 66.7, 40.4, 32.2, 30.0 (broad), 29.8, 29.7, 29.6, 29.4, 28.9, 28.6, 28.4, 25.9, 23.0, 18.0, 17.8, 14.3 ppm.

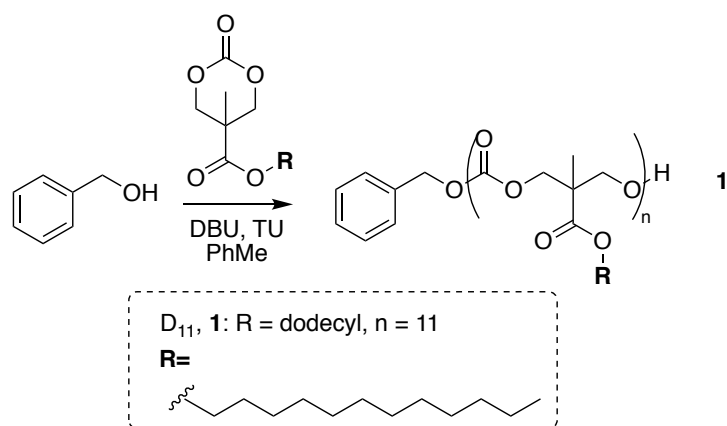

### Synthesis of dodecyl homopolymer $D_{11}$ (**1**)

A flame-dried vial was charged with  $\text{MTC}_{\text{dodecyl}}$  monomer (0.1 mmol), benzyl alcohol (0.013 mmol), and 50  $\mu\text{L}$  toluene under  $\text{N}_2$  atmosphere in a glove box. DBU (0.005 mmol) and TU (0.005 mmol) in 50  $\mu\text{L}$  toluene were added to the reaction vial and allowed to stir. After 90 minutes, the reaction was quenched with benzoic acid then concentrated under reduced pressure. The crude material was dialyzed in  $\text{CH}_2\text{Cl}_2$  against MeOH (1.0 kDa dialysis bag).

#### $D_{11}$ (**1**)

$^1\text{H}$  NMR (400 MHz, Chloroform-*d*)  $\delta$  7.36 (d,  $J = 4.3$  Hz, 5H), 5.14 (s, 2H), 4.47 – 4.18 (m, 44H), 4.10 (t,  $J = 6.6$  Hz, 23H), 1.61 (p,  $J = 6.8$  Hz, 22H), 1.39 – 1.11 (m, 248H), 0.91 – 0.81 (m, 34H).

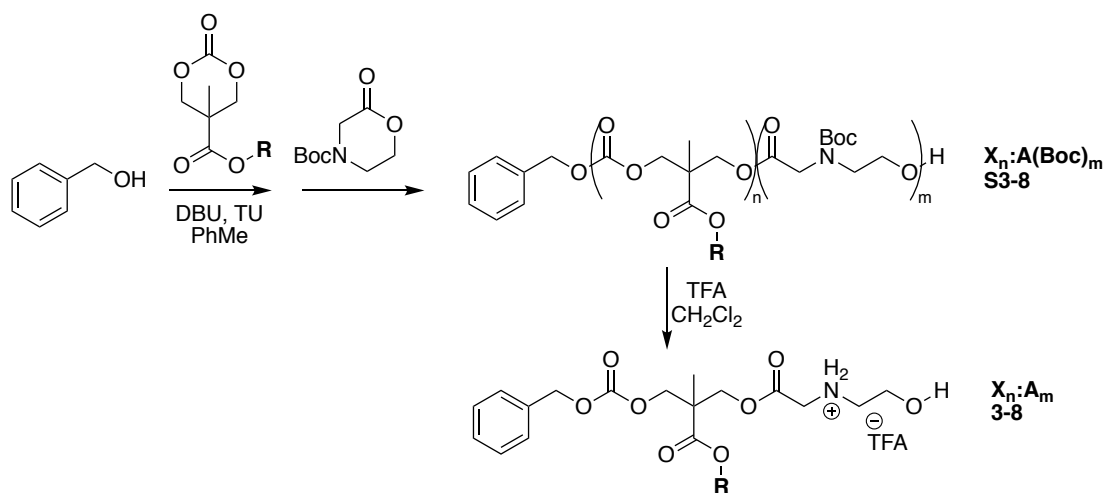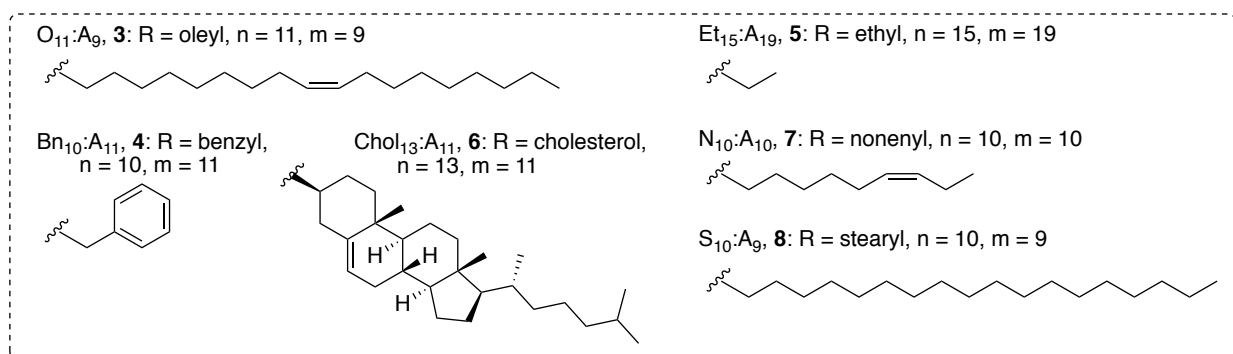

### General procedure for synthesis of single-lipid CARTs X<sub>n</sub>:A<sub>m</sub> (3-8)

For the representative synthesis of Bn<sub>10</sub>:A<sub>11</sub> **4**, a flame-dried vial was charged with MTC<sub>benzyl</sub> monomer (0.22 mmol), benzyl alcohol (0.0185 mmol), and 460  $\mu$ L toluene under N<sub>2</sub> atmosphere in a glove box. DBU (0.02 mmol) and TU (0.02 mmol) were added to the reaction vial and allowed to stir. After 2 h, M<sub>Boc</sub> monomer (0.277 mmol) was added to the vial as a solid and the reaction was allowed to stir for 3 h. After a total of 5 h, the reaction was quenched with benzoic acid then concentrated under reduced pressure. The crude material was dialyzed in CH<sub>2</sub>Cl<sub>2</sub> against MeOH (1.0 kDa dialysis bag). End group analysis by <sup>1</sup>H NMR shows DP 10:11.

Dodecyl-based CART **2** was prepared as previously reported.<sup>3</sup>

#### Boc protected O<sub>11</sub>:A<sub>9</sub> (S3)

<sup>1</sup>H NMR (500 MHz, CDCl<sub>3</sub>)  $\delta$  7.40-7.30 (m, 5H), 5.55-5.27 (m, 23H), 5.17-5.12 (s, 2H), 4.60-4.16 (m, 66H), 4.15-4.05 (m, 22H), 4.02-3.80 (m, 16H), 3.6-3.32 (m, 18H), 2.14-1.88 (m, 39H), 1.69-1.52 (m, 21H), 1.52-1.37 (m, 83H), 1.37-1.01 (m, 296H), 0.95-0.79 (m, 34H) ppm.

#### O<sub>11</sub>:A<sub>9</sub> (3)

<sup>1</sup>H NMR (500 MHz, CD<sub>3</sub>OD)  $\delta$  7.48-7.20 (m, 5H), 5.49-5.27 (m, 20H), 5.17 (s, 2H), 4.68-4.51 (m, 14H), 4.53-4.24 (m, 44H), 4.24-4.01 (m, 33H), 3.59-3.40 (m, 18H), 2.15-1.85 (m, 39H), 1.80-1.51 (m, 26H), 1.51-1.03 (m, 289H), 1.03-0.72 (m, 37H) ppm.

#### Boc protected Bn<sub>10</sub>:A<sub>11</sub> (S4)

$^1\text{H}$  NMR (400 MHz, Chloroform-*d*)  $\delta$  7.43 – 7.20 (m, 55H), 5.13 (d,  $J = 6.8$  Hz, 22H), 4.23 (dq,  $J = 33.9, 14.8, 10.1$  Hz, 67H), 3.91 (dd,  $J = 28.3, 21.8$  Hz, 25H), 3.81 – 3.60 (m, 1H), 3.59 – 3.29 (m, 27H), 1.53 – 1.31 (m, 108H), 1.31 – 1.14 (m, 34H).

**Bn<sub>10</sub>:A<sub>11</sub> (4)**

$^1\text{H}$  NMR (400 MHz, Methanol-*d*<sub>4</sub>)  $\delta$  7.45 – 7.15 (m, 55H), 5.15 (d,  $J = 9.0$  Hz, 18H), 4.64 – 4.48 (m, 19H), 4.48 – 4.19 (m, 48H), 4.19 – 4.06 (m, 17H), 4.06 – 3.92 (m, 12H), 3.44 (ddd,  $J = 27.7, 21.9, 5.8$  Hz, 26H).

**Boc protected Et<sub>15</sub>:A<sub>19</sub> (S5)**

$^1\text{H}$  NMR (400 MHz, Chloroform-*d*)  $\delta$  7.34 (q,  $J = 4.3, 3.4$  Hz, 4H), 5.17 – 5.08 (m, 2H), 4.44 – 4.07 (m, 125H), 3.94 (dd,  $J = 21.0, 6.0$  Hz, 38H), 3.50 (dp,  $J = 18.5, 6.1, 5.5$  Hz, 38H), 1.49 – 1.31 (m, 174H), 1.23 (q,  $J = 4.7, 3.7$  Hz, 94H).

**Et<sub>15</sub>:A<sub>19</sub> (5)**

$^1\text{H}$  NMR (400 MHz, Methanol-*d*<sub>4</sub>)  $\delta$  7.45 – 7.29 (m, 5H), 4.52 – 4.38 (m, 34H), 4.38 – 4.24 (m, 31H), 4.24 – 4.02 (m, 73H), 3.57 – 3.37 (m, 43H), 1.40 – 1.12 (m, 113H).

**Boc protected Chol<sub>13</sub>:A<sub>11</sub> (S6)**

$^1\text{H}$  NMR (500 MHz, CDCl<sub>3</sub>)  $\delta$  7.45-7.30 (m, 5H), 5.43-5.21 (m, 13H), 5.17-5.11 (s, 2H), 4.69-4.57 (m, 13H), 4.45-4.12 (m, 68H), 4.11—3.90 (m, 22H), 3.59-3.47 (m, 22H), 2.35-2.19 (m, 26H), 2.05-1.90 (m, 29H), 1.89-1.75 (m, 43H), 1.63-1.28 (m, 242H), 1.28-0.89 (m, 263H), 0.88-0.81 (m, 76H), 0.71 0.64 (m, 38H) ppm.

**Chol<sub>13</sub>:A<sub>11</sub> (6)**

$^1\text{H}$  NMR (500 MHz, CD<sub>3</sub>OD)  $\delta$  7.48-7.20 (m, 5H), 5.53-5.38 (m, 11H), 5.15 (s, 2H), 4.72-4.51 (m, 26H), 4.50-4.22 (m, 44H), 4.22-3.99 (m, 26H), 3.60-3.36 (m, 26H), 2.49-2.19 (m, 20H), 2.19-1.72 (m, 58H), 1.71-1.24 (m, 177H), 1.21-0.91 (m, 168H), 0.91-0.81 (m, 72H), 0.79-0.67 (m, 33H) ppm.

**Boc protected N<sub>10</sub>:A<sub>10</sub> (S7)**

$^1\text{H}$  NMR (500 MHz, CDCl<sub>3</sub>)  $\delta$  7.39-7.30 (m, 5H), 5.41-5.23 (m, 21H), 5.17-5.12 (s, 2H), 4.46-4.16 (m, 58H), 4.15-4.05 (m, 20H), 4.02-3.80 (m, 20H), 3.6-3.32 (m, 19H), 2.09-1.92 (m, 40H), 1.79-1.55 (m, 24H) 1.50-1.28 (m, 130H), 1.25-1.18 (m, 30H), 1.02-0.82 (m, 27H) ppm.

**N<sub>10</sub>:A<sub>10</sub> (7)**

$^1\text{H}$  NMR (500 MHz, CD<sub>3</sub>OD)  $\delta$  7.48-7.27 (m, 5H), 5.44-5.26 (m, 20H), 5.17-5.12 (s, 2H), 4.62-4.52 (m, 16.5H), 4.51-4.23 (m, 47H), 4.19-4.05 (m, 45H), 3.56-3.41 (m, 20H), 2.14-1.98 (m, 43H), 1.72-1.57 (m, 24H), 1.46-1.08 (m, 81H), 0.99-0.93 (m, 32H) ppm.

**Boc protected S<sub>10</sub>:A<sub>9</sub> (S8)**

$^1\text{H}$  NMR (500 MHz, CDCl<sub>3</sub>)  $\delta$  7.40-7.30 (m, 5H), 5.17-5.12 (s, 2H), 4.46-4.16 (m, 56H), 4.15-4.05 (m, 18H), 4.02-3.80 (m, 18H), 3.6-3.32 (m, 18H), 1.68-1.53 (m, 20H) 1.51-1.35 (m, 89H), 1.34-1.08 (m, 310H), 0.93-0.80 (m, 27H) ppm.

**S<sub>10</sub>:A<sub>9</sub> (8)**

$^1\text{H}$  NMR (500 MHz, CD<sub>3</sub>OD)  $\delta$  7.48-7.27 (m, 5H), 5.17 (s, 2H), 4.68-4.51 (m, 20H), 4.53-4.01 (m, 68H), 3.56-3.40 (m, 26H), 1.80-1.59 (m, 17H), 1.45-1.18 (m, 236H), 1.01-0.79 (m, 23H) ppm.

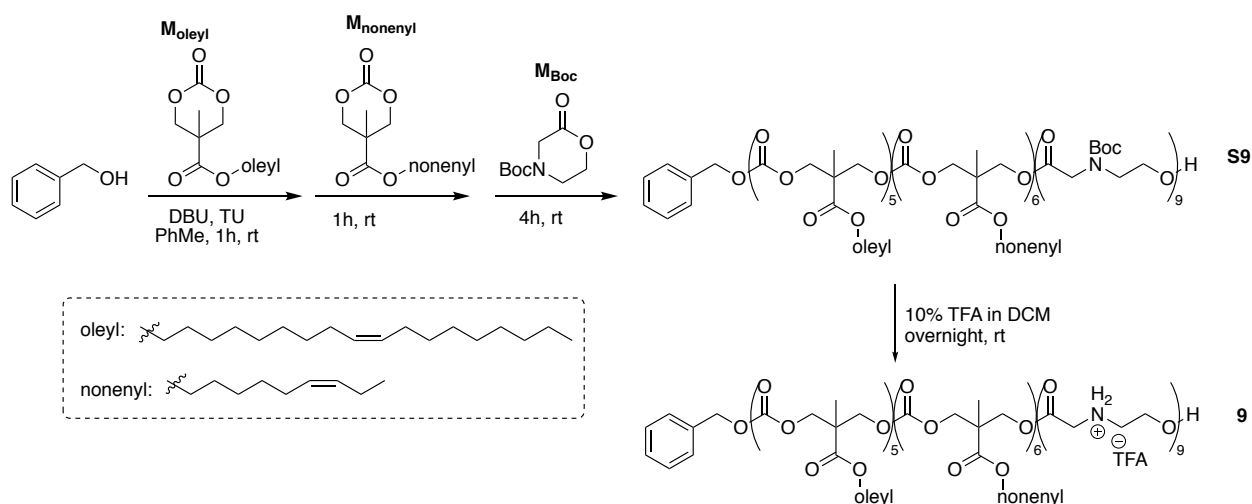

### Synthesis of triblock CARTs $O_5-b-N_6:A_9$ (**9**) and $N_5-b-O_6:A_{10}$ (**10**)

Followed general procedure for CART synthesis above with the addition of a second lipid block. Briefly, to an oven dried 1 dram vial equipped with stir bar under  $N_2$  atmosphere in a glove box was added  $MTC_{oleyl}$  (6 eq., 0.077 mmol, 31.1 mg) and TU (0.05eq., 0.0038 mmol, 1.4 mg). To this was added benzyl alcohol as a 1M solution in toluene (1 eq., 0.0128 mmol, 12.8  $\mu$ L) followed by an additional 134  $\mu$ L of toluene (1M w.r.t.  $M_{Boc}$  monomer). Catalytic 1,8-Diazabicyclo[5.4.0]undec-7-ene (DBU) (1 drop) was then added to the solution and the reaction was allowed to stir at rt for 1 hour in the glove box. At this time  $MTC_{nonenyl}$  (6 eq., 0.077 mmol, 21.7 mg) was added to the reaction. After stirring for another hour,  $M_{Boc}$  (12.66 eq., 0.123 mmol, 27 mg) was added to the reaction and stirred for an additional 4 hours before being quenched with benzoic acid. The reaction was dialyzed in methanol (1.0 kDa dialysis bag) overnight. Concentration yielded protected co-oligomer **S9** as a clear oil. Degree of polymerization was determined by  $^1H$  NMR end group analysis and dispersity by GPC in THF. Subsequent deprotection in 10% TFA in DCM overnight at room temperature under  $N_2$  afforded CART  $O_5-b-N_6:A_9$  (**9**). Complete protecting group removal was confirmed by  $^1H$  NMR ( $CD_3OD$ ).

#### Boc protected $O_5-b-N_6:A_9$ (**S9**)

$^1H$  NMR (400 MHz, Chloroform-*d*)  $\delta$  7.42 – 7.28 (m, 5H), 5.46 – 5.18 (m, 20H), 5.13 (s, 2H), 4.47 – 4.16 (m, 57H), 4.10 (td,  $J = 6.4, 2.0$  Hz, 21H), 3.95 (dt,  $J = 24.4, 4.9$  Hz, 19H), 3.51 (dt,  $J = 18.6, 6.1$  Hz, 18H), 2.13 – 1.89 (m, 40H), 1.60 (hept,  $J = 6.1, 5.6$  Hz, 22H), 1.52 – 1.37 (m, 83H), 1.37 – 1.07 (m, 165H), 0.94 (t,  $J = 7.5$  Hz, 18H), 0.86 (t,  $J = 6.7$  Hz, 14H).

#### $O_5-b-N_6:A_9$ (**9**)

$^1H$  NMR (400 MHz, Methanol-*d*<sub>4</sub>)  $\delta$  7.47 – 7.23 (m, 5H), 5.33 (qd,  $J = 10.4, 9.9, 5.0$  Hz, 20H), 5.15 (s, 2H), 4.56 (q,  $J = 6.0, 5.6$  Hz, 13H), 4.51 – 4.39 (m, 9H), 4.39 – 4.20 (m, 27H), 4.20 – 4.00 (m, 38H), 3.48 (dt,  $J = 13.9, 5.0$  Hz, 17H), 2.05 (p,  $J = 8.2, 7.4$  Hz, 39H), 1.80 – 1.54 (m, 25H), 1.30 (qt,  $J = 22.2, 12.2$  Hz, 177H), 0.93 (dt,  $J = 22.2, 7.3$  Hz, 34H).

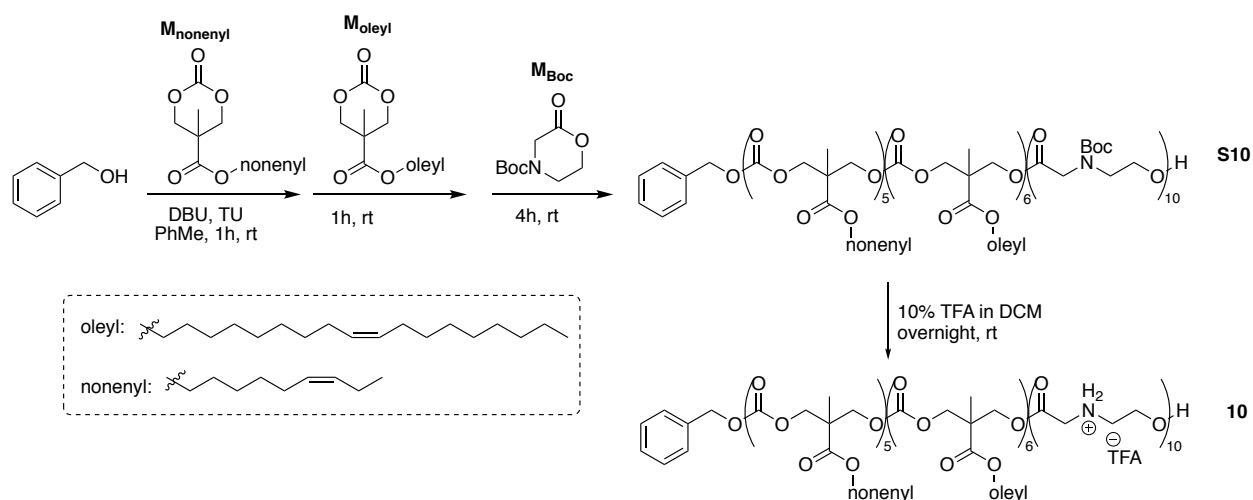

### Synthesis of CART N<sub>5</sub>-b-O<sub>6</sub>:A<sub>10</sub> (**10**)

Followed general procedure for CART synthesis above with the addition of a second lipid block. Briefly, to an oven dried 1 dram vial equipped with stir bar under N<sub>2</sub> atmosphere in a glove box was added MTC<sub>nonenyl</sub> (6 eq., 0.063 mmol, 18 mg) and TU (0.05eq., .0033 mmol, 1.2 mg). To this was added benzyl alcohol as a 1M solution in toluene (1 eq., 0.0106 mmol, 10.6  $\mu$ L) followed by an additional 127 mg of toluene (1M w.r.t. M<sub>BOC</sub> monomer). Catalytic 1,8-Diazabicyclo[5.4.0]undec-7-ene (DBU) (1 drop) was then added to the solution and the reaction was allowed to stir at rt for 1 hour in the glove box. At this time MTC<sub>oleyl</sub> (6 eq., 0.064 mmol, 26.2 mg) was added to the reaction. After stirring for another hour, M<sub>BOC</sub> (12.66 eq., 0.123 mmol, 27 mg) was added to the reaction and stirred for an additional 4 hours before being quenched with benzoic acid. The reaction was dialyzed in methanol (1.0 kDa dialysis bag) overnight. Concentration yielded protected co-oligomer **S10** as a clear oil. Degree of polymerization was determined by <sup>1</sup>H NMR end group analysis and dispersity by GPC in THF. Subsequent deprotection in 10% TFA in DCM overnight at room temperature under N<sub>2</sub> afforded CART N<sub>5</sub>-b-O<sub>6</sub>:A<sub>10</sub> (**10**). Complete protecting group removal was confirmed by <sup>1</sup>H NMR (CD<sub>3</sub>OD).

### Boc protected N<sub>5</sub>-b-O<sub>6</sub>:A<sub>10</sub> (**S10**)

<sup>1</sup>H NMR (400 MHz, Chloroform-*d*)  $\delta$  7.49 – 7.29 (m, 5H), 5.32 (qd,  $J$  = 10.9, 5.2 Hz, 21H), 5.12 (d,  $J$  = 11.9 Hz, 2H), 4.60 – 4.16 (m, 60H), 4.10 (t,  $J$  = 6.5 Hz, 21H), 4.03 – 3.81 (m, 22H), 3.51 (dt,  $J$  = 20.6, 7.3 Hz, 22H), 2.00 (tq,  $J$  = 13.0, 6.5, 5.7 Hz, 43H), 1.62 (p,  $J$  = 6.5 Hz, 25H), 1.53 – 1.06 (m, 300H), 0.94 (t,  $J$  = 7.5 Hz, 11H), 0.87 (t,  $J$  = 6.6 Hz, 17H).

### N<sub>5</sub>-b-O<sub>6</sub>:A<sub>10</sub> (**10**)

<sup>1</sup>H NMR (400 MHz, Methanol-*d*<sub>4</sub>)  $\delta$  7.36 (t,  $J$  = 6.4 Hz, 6H), 5.34 (t,  $J$  = 5.6 Hz, 15H), 5.15 (s, 2H), 4.56 (t,  $J$  = 5.0 Hz, 16H), 4.48 – 4.20 (m, 44H), 4.20 – 3.98 (m, 41H), 3.47 (q,  $J$  = 6.8, 5.8 Hz, 19H), 2.05 (t,  $J$  = 7.3 Hz, 42H), 1.64 (s, 25H), 1.53 – 1.06 (m, 187H), 0.93 (dt,  $J$  = 21.5, 7.3 Hz, 35H).

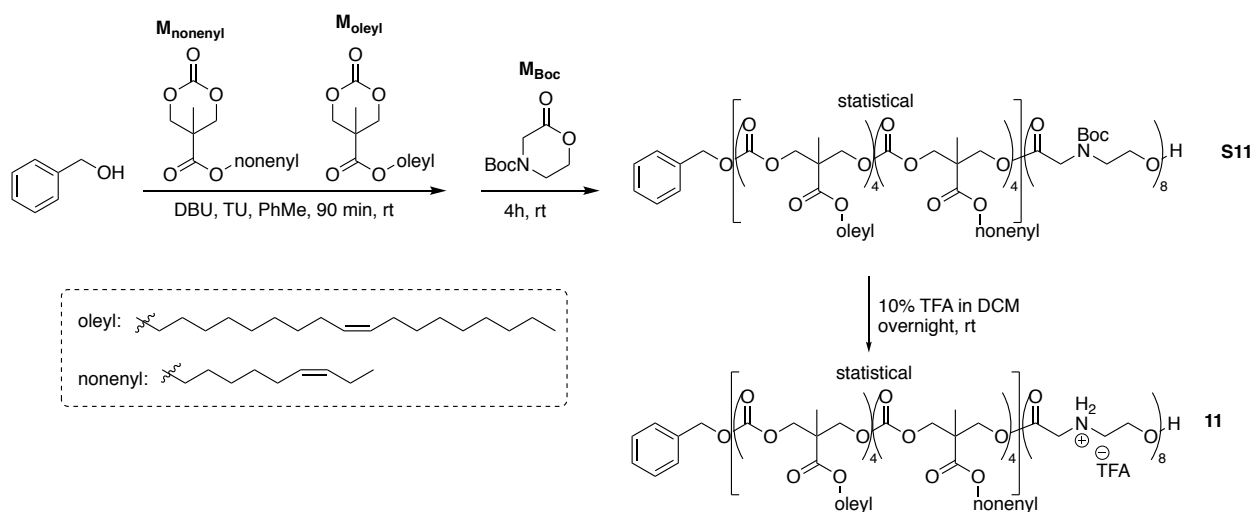

### Synthesis of CART $\text{O}_4\text{-stat-N}_4\text{:A}_8$ (11)

Followed general procedure for CART synthesis above with the modification that both lipid monomers were added simultaneously to produce a statistical block containing both oleyl and monomers, followed by the Boc-protected amino ester block.

#### Boc protected $\text{O}_4\text{-stat-N}_4\text{:A}_8$ (S11)

$^1\text{H NMR}$  (400 MHz, Chloroform- $d$ )  $\delta$  7.42 – 7.28 (m, 5H), 5.46 – 5.20 (m, 13H), 5.14 (s, 2H), 4.25 (d,  $J = 17.0$  Hz, 39H), 4.10 (qd,  $J = 6.6, 6.2, 3.5$  Hz, 14H), 4.03 – 3.83 (m, 14H), 3.52 (dt,  $J = 18.3, 6.0$  Hz, 14H), 2.00 (dtd,  $J = 14.7, 10.0, 8.7, 5.1$  Hz, 27H), 1.62 (p,  $J = 6.5$  Hz, 15H), 1.52 – 1.37 (m, 62H), 1.37 – 1.13 (m, 101H), 0.94 (t,  $J = 7.5$  Hz, 11H), 0.87 (t,  $J = 6.8$  Hz, 8H).

#### $\text{O}_4\text{-stat-N}_4\text{:A}_8$ (11)

$^1\text{H NMR}$  (400 MHz, Methanol- $d_4$ )  $\delta$  7.46 – 7.25 (m, 5H), 5.33 (h,  $J = 8.2, 6.6$  Hz, 17H), 5.15 (s, 2H), 4.57 (q,  $J = 5.2$  Hz, 14H), 4.50 – 4.21 (m, 35H), 4.13 – 4.02 (m, 16H), 3.59 – 3.38 (m, 15H), 2.16 – 1.89 (m, 33H), 1.64 (s, 21H), 1.53 – 1.12 (m, 151H), 0.92 (dt,  $J = 22.1, 7.3$  Hz, 28H).

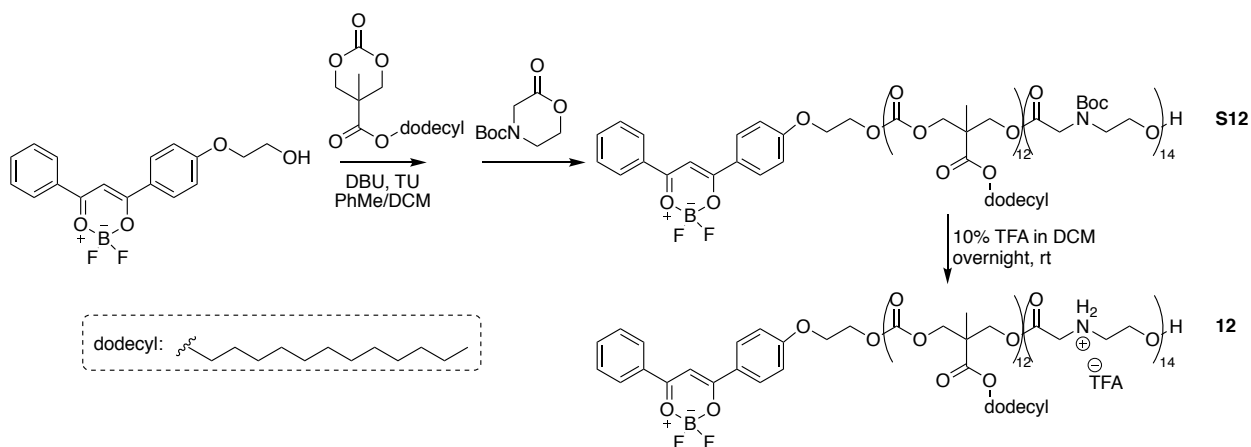

### Synthesis of BDK-initiated CARTs (12-13)

Followed general procedure for CART synthesis above using BDK-alcohol as the initiator (synthesized as previously described)<sup>4</sup> instead of benzyl alcohol. Synthesis, purification, and deprotection were carried out shielded from light.

#### Boc protected BDK-D<sub>12</sub>:A<sub>14</sub> (S12)

<sup>1</sup>H NMR (400 MHz, Chloroform-*d*)  $\delta$  8.21 – 8.06 (m, 2H), 8.03 – 7.90 (m, 2H), 7.76 – 7.41 (m, 3H), 7.17 – 6.72 (m, 3H), 4.42 – 4.16 (m, 73H), 4.10 (t,  $J = 6.8$  Hz, 24H), 4.02 – 3.84 (m, 29H), 3.62 – 3.31 (m, 31H), 1.62 (td,  $J = 14.7, 13.9, 8.0$  Hz, 31H), 1.51 – 1.35 (m, 128H), 1.35 – 1.15 (m, 249H), 0.87 (t,  $J = 6.7$  Hz, 34H).

#### BDK-D<sub>12</sub>:A<sub>14</sub> (12)

<sup>1</sup>H NMR (400 MHz, Methanol-*d*<sub>4</sub>)  $\delta$  8.30 (dd,  $J = 22.8, 8.2$  Hz, 1H), 8.07 (t,  $J = 9.2$  Hz, 2H), 7.66 – 7.43 (m, 2H), 7.22 – 6.96 (m, 2H), 4.57 (q,  $J = 6.1, 5.5$  Hz, 21H), 4.50 – 4.20 (m, 44H), 4.20 – 4.00 (m, 49H), 3.49 (dt,  $J = 10.5, 4.8$  Hz, 26H), 1.63 (s, 25H), 1.50 – 1.06 (m, 234H), 0.90 (t,  $J = 6.7$  Hz, 36H).



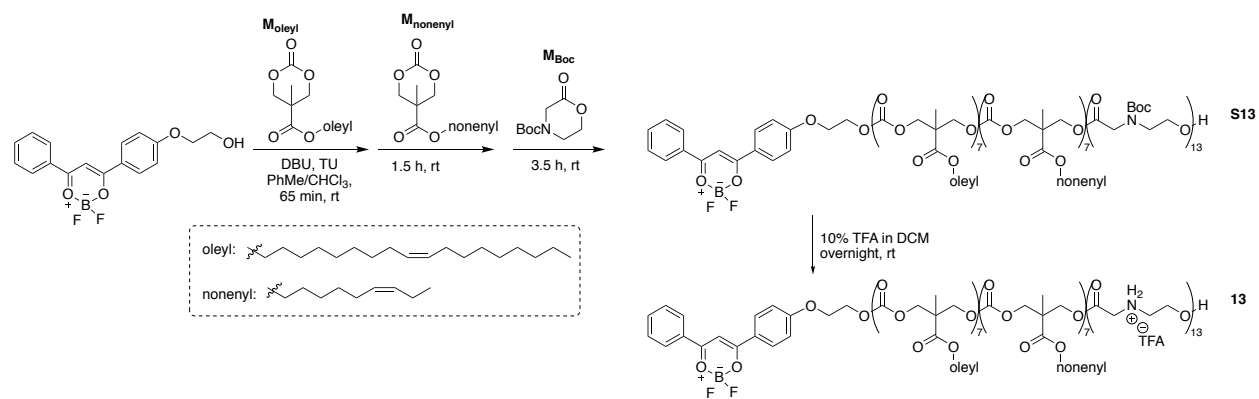

### Boc protected O<sub>7</sub>-b-N<sub>7</sub>:A<sub>13</sub> (S13)

<sup>1</sup>H NMR (300 MHz, CDCl<sub>3</sub>) δ 8.24-7.94 (4H, m), 7.72-7.36 (4H, m), 7.19-6.80 (2H, m), 5.52-5.15 (28H, b), 4.42-4.20 (84H, b), 4.20-4.06 (29H, b), 4.06-3.88 (26H, b), 3.63-3.46 (26H, b), 2.15-1.90 (55H, b), 1.74-1.54 (35H, b), 1.53-1.41 (124H, b), 1.40-1.20 (225H, b), 1.00-0.94 (22H, t), 0.94-0.84 (21H, t) ppm.

### O<sub>7</sub>-b-N<sub>7</sub>:A<sub>13</sub> (13)

<sup>1</sup>H NMR (300 MHz, CD<sub>3</sub>OD) δ 8.35-7.89 (4H, m), 7.70, 7.31 (4H, m), 7.16-6.99 (2H, m), 5.51-5.13 (23H, b), 4.72-4.51 (23H, b), 4.51-4.22 (58H, b), 4.22-4.01 (51H, b), 3.36-3.38 (27H, b), 2.20-1.91 (45H, b), 1.74-1.55 (31H, b), 1.50-1.15 (198H, b), 1.03-0.80 (44H, m) ppm.

## References:

1. Pratt, R. C., Nederberg, F., Waymouth, R. M. & Hedrick, J. L. Tagging alcohols with cyclic carbonate: a versatile equivalent of (meth)acrylate for ring-opening polymerization. *Chem. Commun.* 114–116 (2007). doi:10.1039/B713925J
2. Geihe, E. I. *et al.* Designed guanidinium-rich amphipathic oligocarbonate molecular transporters complex, deliver and release siRNA in cells. *Proc. Natl. Acad. Sci.* **109**, 13171–13176 (2012).
3. McKinlay, C. J. *et al.* Charge-altering releasable transporters (CARTs) for the delivery and release of mRNA in living animals. *Proc. Natl. Acad. Sci.* **114**, E448–E456 (2017).
4. Zhang, G. *et al.* Multi-Emissive Difluoroboron Dibenzoylmethane Polylactide Exhibiting Intense Fluorescence and Oxygen-Sensitive Room-Temperature Phosphorescence. *J. Am. Chem. Soc.* **129**, 8942–8943 (2007).
